# Supplementary material for: Anthropometric and Biochemical Parameters in Relation to Dietary Habits as Early Indicator of Cardiovascular Impairment in Young Adult Cohort
Source: MDPI journal article supplement (doi:10.3390/ijerph17249208), 2020-12-09
Supplement: s1 [file s1]

DATE: \_\_\_\_\_

## 24 Hour Food Recall

- FORM-

FIRST NAME/ LAST NAME \_\_\_\_\_

DATE OF BIRTH: \_\_\_\_\_

SEX:            F            M

HEIGHT: \_\_\_\_\_

WEIGHT: \_\_\_\_\_

At the first appointment subjects were each given three identical forms for tracking food and beverage consumption for the past 24 hours. The first two forms refer to weekdays and the third one to weekend days. All subjects were informed by the researcher via text message/e-mail about filling in the form for the day before so they don't subconsciously alter their usual diet habits. The form itself is constructed as a table for the sake of simplicity and transparency. Table is divided into four main parts: **BREAKFAST**, **LUNCH**, **DINNER** and **SNACK**. Each meal involves food and beverages. Meals are divided into: **FRUIT** (fresh / dry); **VEGETABLES** (fresh / frozen / cooked / baked); **DAIRY PRODUCTS** (milk / cheese / yogurt); **MEAT** (white meat /red meat /fish / processed meat products); **CARBS** (bread / pasta / bagels / potatoes/ rice); **CEREALS** (oats /corn cereal / sweetened cereal); **BEVERAGES** (water / mineral water / coffee / coffee with milk/ tea / natural juice / soda / alcohol); **SWEETS** (chocolate / chips / cookies / cake); **NUTS** (almonds / hazelnuts / walnuts). Method of preparation and portion sizes were taken into consideration depending on the type of food. The subject fills the table in such way as he/she places a plus/tick symbol in the places provided for it in accordance with what he/she consumed that day and how it was prepared. After each meal there is a section called **COMMENT** where it is necessary to emphasize whether the subject was taking any dietary supplement or anything that could significantly affect or alter nutrient intake that day. If not present in the table, what was consumed can also be written in this section. If any of the meals are skipped also indicate.

\*Portion sizes are described as: small (1/2 of a cup / slice / piece); medium/normal (cup / slice / piece); large (2 cups / slices / pieces).

\*\*Way of consumption (dairy products / nuts): separately – a cup of milk, a piece of cheese, a handful of almonds; as part – cereals with milk, sandwich with ham and cheese, cereals with nuts.

|           |                |                |                    |         |              |              |       |        |       |
|-----------|----------------|----------------|--------------------|---------|--------------|--------------|-------|--------|-------|
| BREAKFAST | DAIRY PRODUCTS |                | WAY OF CONSUMPTION |         | PORTION SIZE |              |       |        |       |
|           |                | DIVISION       | Separately         | As part | Small        | Medium       | Large |        |       |
|           |                | Cheese         |                    |         |              |              |       |        |       |
|           |                | Milk           |                    |         |              |              |       |        |       |
|           |                | Yoghurt        |                    |         |              |              |       |        |       |
|           |                | _____          |                    |         |              |              |       |        |       |
|           | MEAT           |                | PREPARATION        |         |              | PORTION SIZE |       |        |       |
|           |                | DIVISION       | Raw                | Cooked  | Baked        | Fried        | Small | Medium | Large |
|           |                | White meat     |                    |         |              |              |       |        |       |
|           |                | Red meat       |                    |         |              |              |       |        |       |
|           |                | Fish           |                    |         |              |              |       |        |       |
|           |                | Meat products  |                    |         |              |              |       |        |       |
|           |                | _____          |                    |         |              |              |       |        |       |
|           | CARBOHYDRATES  |                | PREPARATION        |         |              | PORTION SIZE |       |        |       |
|           |                | DIVISION       | Raw                | Cooked  | Baked        | Fried        | Small | Medium | Large |
|           |                | Bread          |                    |         |              |              |       |        |       |
|           |                | Bagels         |                    |         |              |              |       |        |       |
|           |                | Pasta          |                    |         |              |              |       |        |       |
|           |                | Potatoes       |                    |         |              |              |       |        |       |
|           |                | Rice           |                    |         |              |              |       |        |       |
|           |                | _____          |                    |         |              |              |       |        |       |
|           | FRUIT          |                | PREPARATION        |         | PORTION SIZE |              |       |        |       |
|           |                | DIVISION       | Fresh              | Dried   | Small        | Medium       | Large |        |       |
|           |                | Apple/Pear     |                    |         |              |              |       |        |       |
|           |                | Banana         |                    |         |              |              |       |        |       |
|           |                | Berries        |                    |         |              |              |       |        |       |
|           |                | _____          |                    |         |              |              |       |        |       |
|           | VEGETABLES     |                | PREPARATION        |         |              | PORTION SIZE |       |        |       |
|           |                | DIVISION       | Fresh              | Frozen  | Cooked       | baked        | Small | Medium | Large |
|           |                | Legumes        |                    |         |              |              |       |        |       |
|           |                | Tuberous/Roots |                    |         |              |              |       |        |       |
|           |                | Cabbage        |                    |         |              |              |       |        |       |
|           |                | Bulbs          |                    |         |              |              |       |        |       |
|           |                | Pumpkins       |                    |         |              |              |       |        |       |
|           |                | _____          |                    |         |              |              |       |        |       |
|           |                |                | PORTION SIZE       |         |              |              |       |        |       |
|           | CEREALS        | DIVISION       | Small              | Medium  | Large        |              |       |        |       |
|           |                | Oats           |                    |         |              |              |       |        |       |
|           |                | Corn           |                    |         |              |              |       |        |       |
|           |                | _____          |                    |         |              |              |       |        |       |

|  |           |                     |                    |         |              |        |              |  |  |
|--|-----------|---------------------|--------------------|---------|--------------|--------|--------------|--|--|
|  |           | Sweetened           |                    |         |              |        |              |  |  |
|  |           | _____               |                    |         |              |        |              |  |  |
|  | NUTS      |                     | WAY OF CONSUMPTION |         | PORTION SIZE |        |              |  |  |
|  |           | DIVISION            | Separately         | As part | Small        | Medium | Large        |  |  |
|  |           | Almonds             |                    |         |              |        |              |  |  |
|  |           | Hazelnuts           |                    |         |              |        |              |  |  |
|  |           | Walnuts             |                    |         |              |        |              |  |  |
|  | BEVERAGES |                     | AMOUNT             |         |              |        |              |  |  |
|  |           | DIVISION            | Glass/cup          | 2x      | 3x           | 5x     | More than 5x |  |  |
|  |           | Water               |                    |         |              |        |              |  |  |
|  |           | Mineral water       |                    |         |              |        |              |  |  |
|  |           | Coffee              |                    |         |              |        |              |  |  |
|  |           | Coffee with milk    |                    |         |              |        |              |  |  |
|  |           | Tea                 |                    |         |              |        |              |  |  |
|  |           | Fresh natural juice |                    |         |              |        |              |  |  |
|  |           | Soda                |                    |         |              |        |              |  |  |
|  |           | Alcohol             |                    |         |              |        |              |  |  |

COMMENT:

---



---

|       |               |                |             |        |        |       |              |        |       |
|-------|---------------|----------------|-------------|--------|--------|-------|--------------|--------|-------|
| LUNCH | MEAT          |                | PREPARATION |        |        |       | PORTION SIZE |        |       |
|       |               | DIVISION       | Raw         | Cooked | Baked  | Fried | Small        | Medium | Large |
|       |               | White meat     |             |        |        |       |              |        |       |
|       |               | Red meat       |             |        |        |       |              |        |       |
|       |               | Fish           |             |        |        |       |              |        |       |
|       | CARBOHYDRATES |                | PREPARATION |        |        |       | PORTION SIZE |        |       |
|       |               | DIVISION       | Raw         | Cooked | Baked  | Fried | Small        | Medium | Large |
|       |               | Bread          |             |        |        |       |              |        |       |
|       |               | Bagels         |             |        |        |       |              |        |       |
|       |               | Pasta          |             |        |        |       |              |        |       |
|       |               | Potatoes       |             |        |        |       |              |        |       |
|       |               | Rice           |             |        |        |       |              |        |       |
|       | VEGETABLES    |                | PREPARATION |        |        |       | PORTION SIZE |        |       |
|       |               | DIVISION       | Fresh       | Frozen | Cooked | baked | Small        | Medium | Large |
|       |               | Legumes        |             |        |        |       |              |        |       |
|       |               | Tuberous/Roots |             |        |        |       |              |        |       |
|       |               | Cabbage        |             |        |        |       |              |        |       |
|       |               | Bulbs          |             |        |        |       |              |        |       |
|       |               | Pumpkins       |             |        |        |       |              |        |       |

|  |           |                     |              |    |    |    |              |  |  |
|--|-----------|---------------------|--------------|----|----|----|--------------|--|--|
|  |           | _____               |              |    |    |    |              |  |  |
|  | BEVERAGES |                     | AMOUNT       |    |    |    |              |  |  |
|  |           | DIVISION            | Glass/cup    | 2x | 3x | 5x | More than 5x |  |  |
|  |           | Water               |              |    |    |    |              |  |  |
|  |           | Mineral water       |              |    |    |    |              |  |  |
|  |           | Coffee              |              |    |    |    |              |  |  |
|  |           | Coffee with milk    |              |    |    |    |              |  |  |
|  |           | Tea                 |              |    |    |    |              |  |  |
|  |           | Fresh natural juice |              |    |    |    |              |  |  |
|  |           | Soda                |              |    |    |    |              |  |  |
|  |           | Alcohol             |              |    |    |    |              |  |  |
|  | SOUPS     |                     | PORTION SIZE |    |    |    |              |  |  |
|  |           | DIVISION            | 1x           | 2x | 3x |    |              |  |  |
|  |           | Chicken             |              |    |    |    |              |  |  |
|  |           | Beef                |              |    |    |    |              |  |  |
|  |           | Veggie              |              |    |    |    |              |  |  |
|  |           | Cream               |              |    |    |    |              |  |  |

COMMENT:

---



---

|        |                |               |                    |         |              |        |              |        |       |
|--------|----------------|---------------|--------------------|---------|--------------|--------|--------------|--------|-------|
| DINNER | DAIRY PRODUCTS |               | WAY OF CONSUMPTION |         | PORTION SIZE |        |              |        |       |
|        |                | DIVISION      | Separately         | As part | Small        | Medium | Large        |        |       |
|        |                | Cheese        |                    |         |              |        |              |        |       |
|        |                | Milk          |                    |         |              |        |              |        |       |
|        |                | Yoghurt       |                    |         |              |        |              |        |       |
|        |                | _____         |                    |         |              |        |              |        |       |
|        | MEAT           |               | PREPARATION        |         |              |        | PORTION SIZE |        |       |
|        |                | DIVISION      | Raw                | Cooked  | Baked        | Fried  | Small        | Medium | Large |
|        |                | White meat    |                    |         |              |        |              |        |       |
|        |                | Red meat      |                    |         |              |        |              |        |       |
|        |                | Fish          |                    |         |              |        |              |        |       |
|        |                | Meat products |                    |         |              |        |              |        |       |
|        |                | _____         |                    |         |              |        |              |        |       |
|        | CARBOHYDRATES  |               | PREPARATION        |         |              |        | PORTION SIZE |        |       |
|        |                | DIVISION      | Raw                | Cooked  | Baked        | Fried  | Small        | Medium | Large |
|        |                | Bread         |                    |         |              |        |              |        |       |
|        |                | Bagels        |                    |         |              |        |              |        |       |

|  |            |                     |              |        |              |        |              |        |       |
|--|------------|---------------------|--------------|--------|--------------|--------|--------------|--------|-------|
|  |            | Pasta               |              |        |              |        |              |        |       |
|  |            | Potatoes            |              |        |              |        |              |        |       |
|  |            | Rice                |              |        |              |        |              |        |       |
|  | FRUIT      |                     | PREPARATION  |        | PORTION SIZE |        |              |        |       |
|  |            | DIVISION            | Fresh        | Dried  | Small        | Medium | Large        |        |       |
|  |            | Apple/Pear          |              |        |              |        |              |        |       |
|  |            | Banana              |              |        |              |        |              |        |       |
|  |            | Berries             |              |        |              |        |              |        |       |
|  |            | _____               |              |        |              |        |              |        |       |
|  | VEGETABLES |                     | PREPARATION  |        |              |        | PORTION SIZE |        |       |
|  |            | DIVISION            | Fresh        | Frozen | Cooked       | Baked  | Small        | Medium | Large |
|  |            | Legumes             |              |        |              |        |              |        |       |
|  |            | Tuberous/Roots      |              |        |              |        |              |        |       |
|  |            | Cabbage             |              |        |              |        |              |        |       |
|  |            | Bulbs               |              |        |              |        |              |        |       |
|  |            | Pumpkins            |              |        |              |        |              |        |       |
|  |            | _____               |              |        |              |        |              |        |       |
|  | CEREALS    |                     | PORTION SIZE |        |              |        |              |        |       |
|  |            | DIVISION            | Small        | Medium | Large        |        |              |        |       |
|  |            | Oats                |              |        |              |        |              |        |       |
|  |            | Corn                |              |        |              |        |              |        |       |
|  |            | Sweetened           |              |        |              |        |              |        |       |
|  |            | _____               |              |        |              |        |              |        |       |
|  | BEVERAGES  |                     | AMOUNT       |        |              |        |              |        |       |
|  |            | DIVISION            | Glass/cup    | 2x     | 3x           | 5x     | More than 5x |        |       |
|  |            | Water               |              |        |              |        |              |        |       |
|  |            | Mineral water       |              |        |              |        |              |        |       |
|  |            | Coffee              |              |        |              |        |              |        |       |
|  |            | Coffee with milk    |              |        |              |        |              |        |       |
|  |            | Tea                 |              |        |              |        |              |        |       |
|  |            | Fresh natural juice |              |        |              |        |              |        |       |
|  |            | Soda                |              |        |              |        |              |        |       |
|  |            | Alcohol             |              |        |              |        |              |        |       |

COMMENT:

---



---

|       |      |           |                    |         |              |        |       |
|-------|------|-----------|--------------------|---------|--------------|--------|-------|
| SNACK | NUTS |           | WAY OF CONSUMPTION |         | PORTION SIZE |        |       |
|       |      | DIVISION  | Separately         | As part | Small        | Medium | Large |
|       |      | Almonds   |                    |         |              |        |       |
|       |      | Hazelnuts |                    |         |              |        |       |

|                     |           |                  |                    |              |              |        |              |
|---------------------|-----------|------------------|--------------------|--------------|--------------|--------|--------------|
|                     |           | Walnuts          |                    |              |              |        |              |
|                     |           | _____            |                    |              |              |        |              |
|                     | FRUIT     |                  | WAY OF CONSUMPTION |              | PORTION SIZE |        |              |
|                     |           | DIVISION         | Fresh              | Dried        | Small        | Medium | Large        |
|                     |           | Apple/Pear       |                    |              |              |        |              |
|                     |           | Banana           |                    |              |              |        |              |
|                     |           | Berries          |                    |              |              |        |              |
|                     |           | Citrus           |                    |              |              |        |              |
|                     |           | _____            |                    |              |              |        |              |
|                     |           | SWEETS           |                    | PORTION SIZE |              |        |              |
|                     | DIVISION  |                  | Small              | Medium       | Large        |        |              |
|                     | Chocolate |                  |                    |              |              |        |              |
|                     | Chips     |                  |                    |              |              |        |              |
|                     | Cookies   |                  |                    |              |              |        |              |
|                     | Cake      |                  |                    |              |              |        |              |
|                     | _____     |                  |                    |              |              |        |              |
|                     | BEVERAGES |                  |                    | AMOUNT       |              |        |              |
|                     |           | DIVISION         | Glass/cup          | 2x           | 3x           | 5x     | More than 5x |
|                     |           | Water            |                    |              |              |        |              |
|                     |           | Mineral water    |                    |              |              |        |              |
|                     |           | Coffee           |                    |              |              |        |              |
|                     |           | Coffee with milk |                    |              |              |        |              |
|                     |           | Tea              |                    |              |              |        |              |
| Fresh natural juice |           |                  |                    |              |              |        |              |
| Soda                |           |                  |                    |              |              |        |              |
| Alcohol             |           |                  |                    |              |              |        |              |

COMMENT:

---



---
